# Supplementary material
Source: Elsevier journal article supplement (http://www.nightfallgames.com/files/Utils/mmc02.zip)
Supplement: mmc02 [file mmc02.zip]

                        Dragons Breath Productions (R)
                           Multi-Monster Changer 
                             (Copyright 1995) 


            Multi-Monster Changer is a program that randomizes monster sets
           of 131 for LORD!  It has the ability to randomize 10 sets, 
           totalling an astounding 1310 monsters just by the change of
           simple commandline parameters.  It comes with a fully 
           fuctional installation/uninstallation program, and it is
           ABSOLUTELY FREEWARE! Forget LORDRAND, Free... Easier To Use..


          -=Installation=-
          ----------------

          First, unzip the file mm02.zip and check to see if all its contents
          are there :

          MULTMONS.DOC
          WHATSNEW.!!!
          MULTMONS.EXE
          LORD01.DAT
          LORD02.DAT
          LORD03.DAT
          LORD04.DAT
          INSTALL.EXE
          FILE_ID.DIZ

          A Majority of these are essential for the proper installation of 
          this program.  After checking the contents of the zip, run the 
          install program, and type 1 then hit the enter key to begin
          installation.  The First thing the program should do is ask if you
          use START.BAT to boot lord, since some Operating Systems use 
          start.bat to boot the system, people have to use different batch
          file names.  If you are using a batch file for LORD 3.26 besides
          Start.bat, hit no.  If you hit no, the program will prompt you for
          the name of your batch file. Enter it there, with filename
          extension (Example : ME.BAT) and press enter.  Next, the program
          will prompt you for your LORD Path.  Do not mess this one up <BG>
          Put your LORD path WITHOUT trailing backslash.

          Incorrect Way :
          C:\lord\

          Correct Way :
          C:\lord

          Now hit enter, and the program will move <not copy> all but the 
          install program, since it is running and can't me moved.  
          Make sure all are moved, if not, end the installation, reunzip
          the zip, and install again.  Next, the program edits the batch
          file you put (Whether it was start.bat or something else)
          it will simply change one line to :

          MULTMONS.EXE 4

          And after that, your installation is complete, whenever you
          boot lord, there will be a new set of 131 monsters.

          
          -= Monster Sets =-
          ------------------
          This release has the capability of holding 10 sets of monsters,
          which in the future will rise, as more are made.  However,
          the program cannot detect how many monster sets you are having,
          you must designate it with command line parameters. When 
          MULTMONS.EXE was entered in start.bat, a 4 was put beside it like
          this :  MULTMONS.EXE 4 

          This Means it will randomize 4 monster sets, which are named
          in sequence lord01.dat , lord02.dat , lord03.dat , lord04.dat.
          However, the number of sets randomized can be changed from 2 to 10.

          For Instance, if I wanted to Randomize 7 Sets of Monsters, I would
          put Multmons.exe 7.  However, just because you put 7, doesn't mean
          it will randomize 7.  Only 4 were included with the release, so you
          have to create your own.  You can do this by taking any other 
          lenemy.dat file and typing : Copy lenemy.dat lord05.dat, or whichever
          lordxx.dat needed.  If you do not have these installed and the
          program runs, no harm done, an error message will pop up, and
          the lenemy.dat will remain the same as last time.

          Sets of Monsters :

          LORD01.DAT : The Dragons Destruction .05
          LORD02.DAT : Winterized Lord 2
          LORD03.DAT : Original LORD
          LORD04.DAT : NightFall

          <My Regards to The Authors, Great Addons...  >

          In the future, Dragons Breath Productions will be releasing 
          Creatures of the Sea and adding more Lenemy.dats to the Multi-Monster
          Changer releases.

          -= UnInstallation =-
          --------------------

          Awwwwww Mannnnnnn!!! Ok, to uninstall the program, go back into the 
          install program(in your lord directory) and run deinstall.  It
          will first return your batch file to normal, then ask you whether
          you would like to delete all files or not <Except for Install.exe 
          which must be deleted manually>  Simply press Y or N and your done.

          
          -= Registration =-
          ------------------

          Remember, this is FreeWare! Everything is free.  However,
          if you would like to send donations, my address is

          William D. Walls
          4202 Quail Springs Circle
          Martinez, GA 30907
          USA           

          Anything will be greatly appreciated.  I also encourage you
          to register my other addon, The Dragons Destruction! Only $5
          for all future IGMs made (Already Working) and a new Lordtxt.dat
          and lenemy.dat!  

          -= Credits =-
          -------------

          Seth Able :: For Making LORD, And Assisting Me In Times Of Brain 
                       FREEZES.

          Bob Hindal :: Some good help with Programming
          The Maker of Winterized Lord and Nightfall - I love 'em!
          You :: For Supporting Dragons Breath Productions

          -= Suggestions, Problems, Comments =-
          -------------------------------------

          Theres nothing I love more than a suggestion, please if you can,
          tell me what you think.   You can reach me at :

          My BBS     : 1-706-869-1194
          Prodigy    : RXKW02A
          Internet   : RXKW02A@PRODIGY.COM
          Seth's BBS : Write To Flinn the Mighty


              _____  _   _    __    _   _  _ _
                |    |___|   /__\   |\  |  |/
                |    |   |  /    \  |  \|  |\_ 
           
                            You....

                                For Your Time   
                                 

                                        Flinn the King
                                 Head of Dragons Breath Productions
           
